# Supplementary material for: Informational laws of genome structures
Source: PubMed Central journal article supplement (PMC4937431; doi:10.1038/srep28840), 2016-06-29
Supplement: srep28840-s1.pdf [file srep28840-s1.pdf]

# Supplementary Information for

## *Informational laws of genome structures*

Vincenzo Bonnici<sup>1,2</sup> and Vincenzo Manca<sup>1,2,\*</sup>

<sup>1</sup>University of Verona, Department of Computer Science, University of Verona, Verona 37134, Italy

<sup>2</sup>Center for BioMedical Computing, University of Verona, Verona, 37134, Italy

\*vincenzo.manca@univr.it

### ABSTRACT

Figures and tables, supplementary to the main papers, are given that concern the 70 investigated genomes. Table 5 presents the essential data and the public databases where genomes were downloaded. Table 6 reports experiments in computational synthetic biology.

## Table of Content

|                                                                                                                        |   |
|------------------------------------------------------------------------------------------------------------------------|---|
| Figure 1: Taxonomy tree of the 70 genomes (Sup. Fig. 1)                                                                | 2 |
| Figure 2: A 3D-visualization of 70 genomes (axes $AC, LX, BB$ ) by means of Principal Component Analysis (Sup. Fig. 2) | 3 |
| Figure 3: The partition of LG represented by means of ellipses (Sup. Fig. 3)                                           | 3 |
| Table 1: Horizontal Eccentricity Classes (Sup. Table 1)                                                                | 4 |
| Table 2: $AC$ values for a kernel of 40 genomes (Sup. Table 2)                                                         | 5 |
| Table 3: Informational indexes for the 70 genomes (Sup. Table 3)                                                       | 6 |
| Table 4 Entropies and indexes for different values of $k$ (Sup. Table 4)                                               | 7 |
| Table 5 Basic data of the 70 genomes (Sup. Table 5)                                                                    | 8 |
| Table 6 Computational experiments on synthetic genomes (Sup. Table 6)                                                  | 9 |

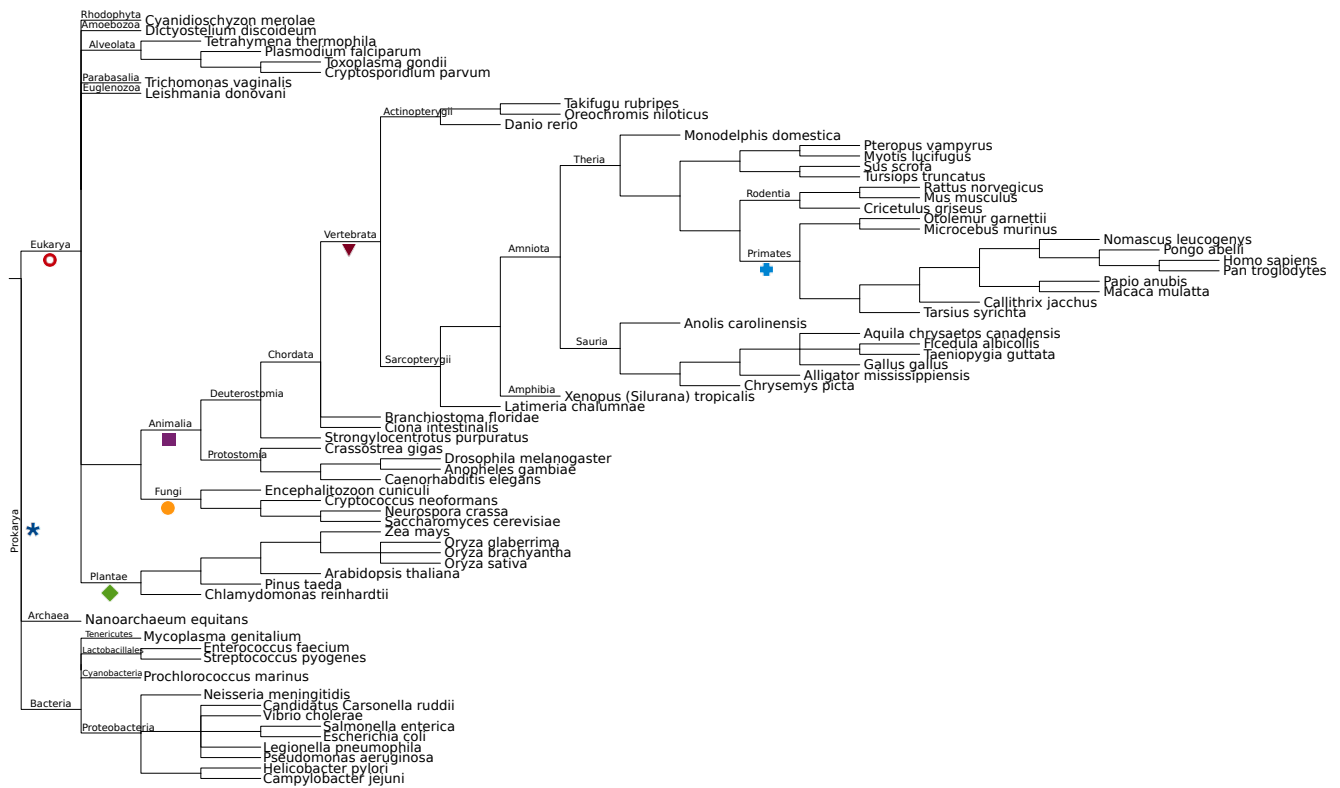

**Figure 1.** A taxonomy tree of the 70 analysed genomes. The has been built via the NCBI taxonomy (see reference 40 on the main paper) on-line service (<http://www.ncbi.nlm.nih.gov/Taxonomy/CommonTree/wwwcmt.cgi>). Branches of interest (Prokarya, Eukarya, Plantae, Fungi, Animalia, Vertebrata and Primates) are marked with their corresponding icon. Branches of the tree have fixed length, as opposed to classical phylogenetic trees where they length is based upon genetic distances.

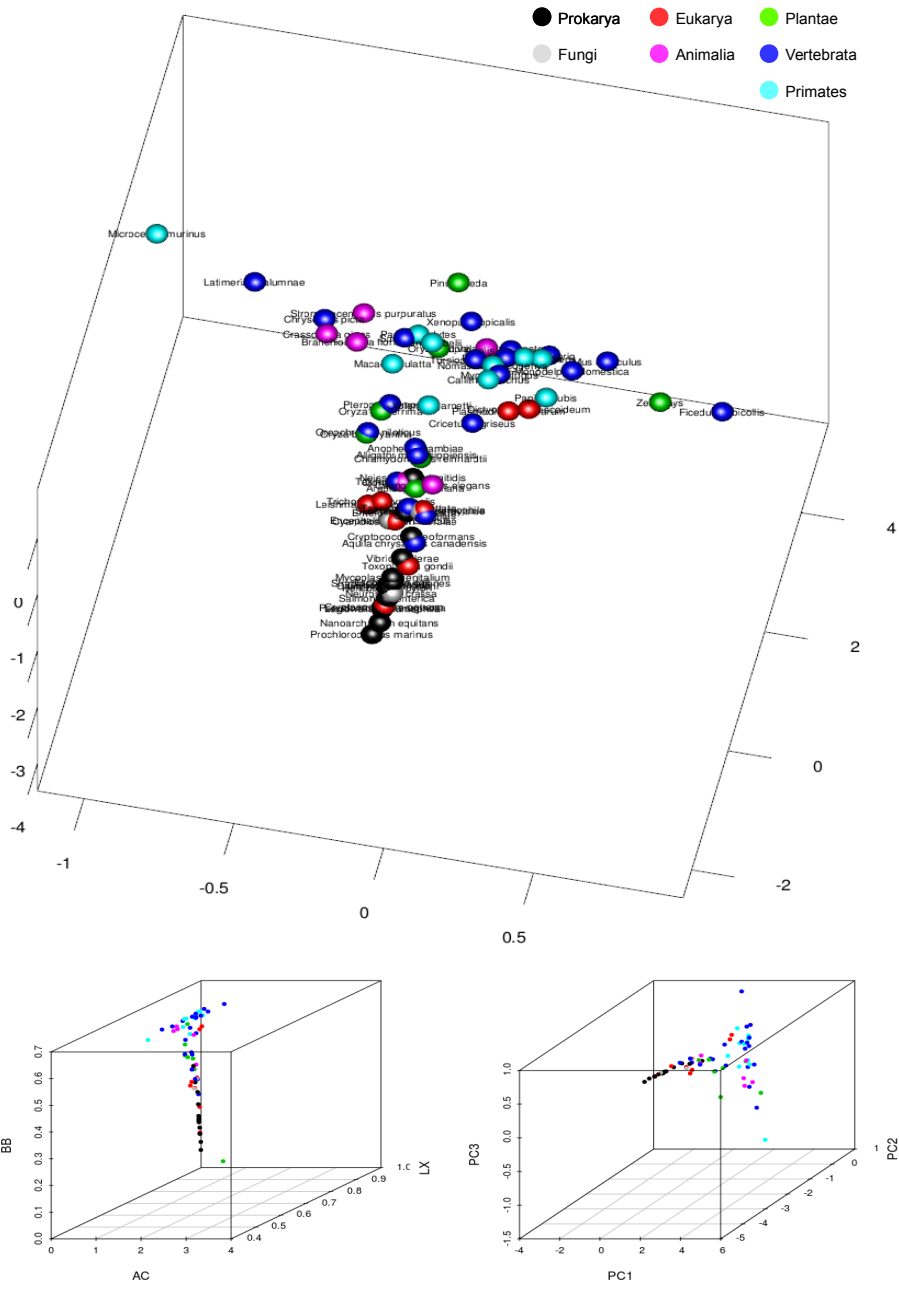

**Figure 2.** A 3D-visualization of 70 investigated genomes, obtained by taking into account three informational indexes *AC*, *LX*, *BB*. Bottom-left: the raw values of the three variables are plotted in 3D; Bottom-right: along the three axes Principal Component Analysis (PCA) of values on the left are used; Top: an enlarged version of Bottom-right is given, where a sort of tree (with exceptions) is apparent, going bottom-up (from primitive to more complex genomes).

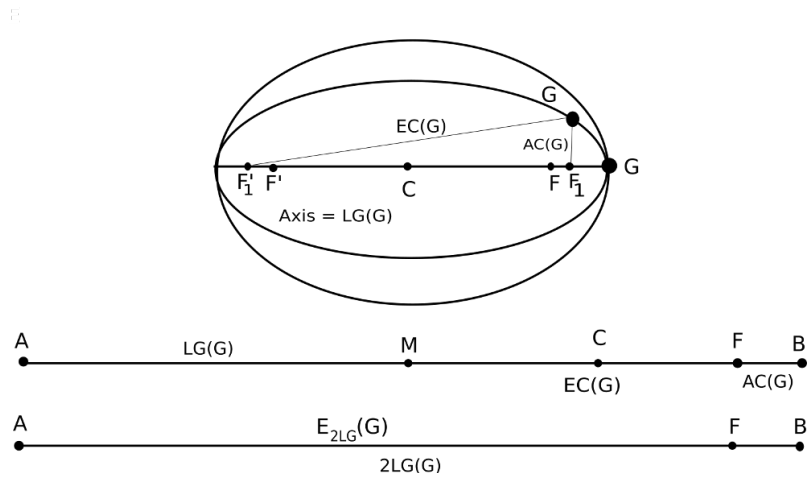

**Figure 3.** The partition of genome logarithmic length and the horizontal and vertical genomic ellipses. Segment  $AB$  corresponds to  $2LG$ , segments  $AM, MB$  correspond to  $LG$ , segment  $AF$  corresponds to  $E_{2LG}$ , segment  $MF$  and  $FB$  correspond to  $EC$  and  $AC$ , respectively, and  $F$  determines a partition of  $LG$ . Point  $F$  correspond to a focus of the horizontal ellipse, while  $F_1$  to a focus of the vertical ellipse, and  $C$  is the center of ellipses. The less eccentric ellipse is the *horizontal genomic ellipse*, where  $\mathbb{G}$  is on the major axis, while the more eccentric one is the *vertical genomic ellipse*, where  $\mathbb{G}$  is on the line orthogonal to the major axis and passing on its focus. The eccentricity  $EV$  of the vertical ellipse is the root square of the horizontal eccentricity  $EH$ , and the distance between the foci  $F$  and  $F_1$  is  $EV(1 - EV)LG/2$ . Infinite ellipses, with the same major axis, but with different values of eccentricity, can represent  $\mathbb{G}$  as a point placed at different angles from the axis. The genomic complexity measure  $BB(\mathbb{G})$ , *biobit* of  $\mathbb{G}$ , is defined by means of the horizontal eccentricity  $EH$ .

| <b>First Class</b>                   | Eccentriciy | Range 0.9990-0.9400 |
|--------------------------------------|-------------|---------------------|
| <i>Prochlorococcus marinus</i>       | 0.9991      |                     |
| <i>Nanoarchaeum equitans</i>         | 0.9978      |                     |
| <i>Pseudomonas aeruginosa</i>        | 0.9969      |                     |
| <i>Legionella pneumophila</i>        | 0.9969      |                     |
| <i>Cryptosporidium parvum</i>        | 0.9969      |                     |
| <i>Salmonella enterica</i>           | 0.9956      |                     |
| <i>Neurospora crassa</i>             | 0.9956      |                     |
| <i>Helicobacter pylori</i>           | 0.9956      |                     |
| <i>Campylobacter jejuni</i>          | 0.9934      |                     |
| <i>Escherichia coli</i>              | 0.9931      |                     |
| <i>Streptococcus pyogenes</i>        | 0.9928      |                     |
| <i>Carsonella ruddii</i>             | 0.9919      |                     |
| <i>Mycoplasma genitalium</i>         | 0.9910      |                     |
| <i>Toxoplasma gondii</i>             | 0.9909      |                     |
| <i>Aquila chrysaetos canadensis</i>  | 0.9883      |                     |
| <i>Vibrio cholerae</i>               | 0.9879      |                     |
| <i>Cryptococcus neoformans</i>       | 0.9838      |                     |
| <i>Gallus gallus</i>                 | 0.9819      |                     |
| <i>Taeniopygia guttata</i>           | 0.9812      |                     |
| <i>Cyanidioschyzon merolae</i>       | 0.9807      |                     |
| <i>Leishmania donovani</i>           | 0.9794      |                     |
| <i>Encephalitozoon cuniculi</i>      | 0.9782      |                     |
| <i>Tetrahymena thermophila</i>       | 0.9781      |                     |
| <i>Saccharomyces cerevisiae</i>      | 0.9754      |                     |
| <i>Enterococcus faecium</i>          | 0.9748      |                     |
| <i>Takifugu rubripes</i>             | 0.9733      |                     |
| <i>Arabidopsis thaliana</i>          | 0.9725      |                     |
| <i>Ciona intestinalis</i>            | 0.9708      |                     |
| <i>Caenorhabditis elegans</i>        | 0.9694      |                     |
| <i>Trichomonas vaginalis</i>         | 0.9691      |                     |
| <i>Alligator mississippiensis</i>    | 0.9665      |                     |
| <i>Oreochromis niloticus</i>         | 0.9605      |                     |
| <i>Oryza brachyantha</i>             | 0.9591      |                     |
| <i>Anopheles gambiae</i>             | 0.9588      |                     |
| <i>Neisseria meningitidis</i>        | 0.9585      |                     |
| <i>Pteropus vampyrus</i>             | 0.9498      |                     |
| <i>Cricetulus griseus</i>            | 0.9470      |                     |
| <i>Oryza glaberrima</i>              | 0.9464      |                     |
| <b>Second Class</b>                  | Eccentriciy | Range 0.9300-0.8400 |
| <i>Chlamydomonas reinhardtii</i>     | 0.9303      |                     |
| <i>Macaca mulatta</i>                | 0.9264      |                     |
| <i>Papio anubis</i>                  | 0.9190      |                     |
| <i>Callithrix jacchus</i>            | 0.9178      |                     |
| <i>Myotis lucifugus</i>              | 0.9086      |                     |
| <i>Crassostrea gigas</i>             | 0.9049      |                     |
| <i>Chrysemys picta</i>               | 0.9042      |                     |
| <i>Branchiostoma floridae</i>        | 0.9041      |                     |
| <i>Nomascus leucogenys</i>           | 0.9040      |                     |
| <i>Tursiops truncatu</i>             | 0.9023      |                     |
| <i>Plasmodium falciparum</i>         | 0.9015      |                     |
| <i>Sus scrofa</i>                    | 0.9006      |                     |
| <i>Pongo albelii</i>                 | 0.8989      |                     |
| <i>Dictyostelium discoideum</i>      | 0.8964      |                     |
| <i>Pan troglodytes</i>               | 0.8948      |                     |
| <i>Rattus norvegicus</i>             | 0.8919      |                     |
| <i>Branchiostoma floridae</i>        | 0.8895      |                     |
| <i>Tarsius syrichta</i>              | 0.8878      |                     |
| <i>Monodelphis domestica</i>         | 0.8875      |                     |
| <i>Latimeria chalumnae</i>           | 0.8857      |                     |
| <i>Homo sapiens</i>                  | 0.8817      |                     |
| <i>Oryza sativa</i>                  | 0.8790      |                     |
| <i>Strongylocentrotus purpuratus</i> | 0.8711      |                     |
| <i>Ficedula albicollis</i>           | 0.8684      |                     |
| <i>Anolis carolinensis</i>           | 0.8647      |                     |
| <i>Danio rerio</i>                   | 0.8581      |                     |
| <i>Mus musculus</i>                  | 0.8504      |                     |
| <i>Microcebus murinus</i>            | 0.8499      |                     |
| <b>Third Class</b>                   | Eccentriciy | Range 0.8300-0.7300 |
| <i>Xenopus tropicalis</i>            | 0.8260      |                     |
| <i>Drosophila melanogaster</i>       | 0.8173      |                     |
| <b>Fourth Class</b>                  | Eccentriciy | Range 0.7400-0.5200 |
| <i>Pinus taeda</i>                   | 0.7450      |                     |
| <i>Zea mays</i>                      | 0.5258      |                     |

**Table 1.** Classes of horizontal genomic eccentricity. The classes are clearly divided by jumps between extremal values of the four eccentricity classes.

| Species                   | LG(G)  | N%    | Genes | AC(G) |
|---------------------------|--------|-------|-------|-------|
| Carsonella ruddii         | 8.642  | 0.00  | 0.1k  | 0.035 |
| Chlamydomonas reinhardtii | 8.872  | 0.00  | 14.4k | 0.309 |
| Mycoplasma genitalium     | 9.573  | 0.00  | 0.5k  | 0.043 |
| Trichomonas vaginalis     | 9.579  | 0.36  | 60.8k | 0.148 |
| Campylobacter jejuni      | 10.323 | 0.00  | 1.6k  | 0.034 |
| Helicobacter pylori       | 10.335 | 0.00  | 1.5k  | 0.033 |
| Prochlorococcus marinus   | 10.370 | 0.00  | 1.9k  | 0.005 |
| Streptococcus pyogenes    | 10.410 | 0.00  | 1.8k  | 0.037 |
| Neisseria meningitidis    | 10.558 | 0.00  | 2.1k  | 0.219 |
| Encephalitozoon cuniculi  | 10.626 | 0.03  | 2.0k  | 0.115 |
| Enterococcus faecium      | 10.771 | 0.00  | 3.2k  | 0.135 |
| Caenorhabditis elegans    | 13.290 | 0.00  | 46.6k | 0.203 |
| Tetrahymena thermophila   | 13.309 | 0.06  | 26.9k | 0.145 |
| Arabidopsis thaliana      | 13.417 | 0.16  | 33.5k | 0.184 |
| Oryza brachyantha         | 13.951 | 6.43  | 24.2k | 0.286 |
| Takifugu rubripes         | 14.035 | 4.52  | 17.3k | 0.187 |
| Oryza glaberrima          | 14.043 | 4.00  | 73.8k | 0.376 |
| Oryza sativa              | 14.256 | 2.63  | 30.5k | 0.862 |
| Branchiostoma floridae    | 14.480 | 7.95  | 28.6k | 0.694 |
| Crassostrea gigas         | 14.527 | 11.81 | 32.2k | 0.690 |
| Oreochromis niloticus     | 14.646 | 7.74  | 22.6k | 0.289 |
| Taeniopygia guttata       | 14.964 | 0.64  | 14.1k | 0.140 |
| Pteropus vampyrus         | 15.447 | 7.85  | 33.3k | 0.397 |
| Myotis lucifugus          | 15.461 | 3.35  | 44.1k | 0.706 |
| ***Zea mays               | 15.470 | 0.63  | 52.2k | 3.668 |
| Cricetulus griseus        | 15.568 | 2.49  | 26.1k | 0.412 |
| Tursiops truncatus        | 15.624 | 8.60  | 23.7k | 0.763 |
| Chrysemys picta           | 15.635 | 16.66 | 23.6k | 0.748 |
| Sus scrofa                | 15.637 | 10.52 | 35.5k | 0.776 |
| Papio anubis              | 15.672 | 1.54  | 38.6k | 0.635 |
| Mus musculus              | 15.672 | 2.86  | 46.2k | 1.172 |
| Callithrix jacchus        | 15.684 | 5.38  | 33.2k | 0.644 |
| Rattus norvegicus         | 15.687 | 4.68  | 37.2k | 0.847 |
| Nomascus leucogenys       | 15.690 | 6.57  | 27.3k | 0.753 |
| Latimeria chalumnae       | 15.707 | 23.67 | 26.1k | 0.897 |
| Pongo abelii              | 15.748 | 10.12 | 29.7k | 0.796 |
| Homo sapiens              | 15.762 | 4.88  | 50.7k | 0.932 |
| Pan troglodytes           | 15.776 | 12.41 | 33.1k | 0.829 |
| Tarsius syrichta          | 15.843 | 1.39  | 25.9k | 0.888 |
| Monodelphis domestica     | 15.853 | 2.56  | 34.8k | 0.891 |
| ***Pinus taeda            | 17.216 | 13.08 | 50.1k | 2.194 |

**Table 2.** AC values for forty different species. Length of genomes, *N%* (the percentage of unknown nucleotides), and number of genes (in the wider sense of transcribed regions, that is, protein and non-protein coding genes) are not related to AC values. Color red and \*\*\* mark two cases of anomalous AC values. Finding a genomic complexity measure based on AC, but overcoming the anomalies of two marked cases, was the starting point of the logarithmic length partition idea and of informational indexes based on it.

| Species                       | LG(G)   | EC(G)   | AC(G)  | LX(G)  | AF(G)  | EH(G)  | BB(G)  |
|-------------------------------|---------|---------|--------|--------|--------|--------|--------|
| Carsonella ruddii             | 8.6423  | 8.6069  | 0.0355 | 1.0158 | 0.0041 | 0.9918 | 0.1837 |
| Chlamydomonas reinhardtii     | 8.8722  | 8.5628  | 0.3094 | 1.0967 | 0.0349 | 0.9302 | 0.4478 |
| Nanoarchaeum equitans         | 9.4525  | 9.4429  | 0.0097 | 1.0029 | 0.0010 | 0.9980 | 0.0977 |
| Mycoplasma genitalium         | 9.5729  | 9.5302  | 0.0428 | 1.0177 | 0.0045 | 0.9911 | 0.2013 |
| Trichomonas vaginalis         | 9.5790  | 9.4314  | 0.1476 | 1.0687 | 0.0154 | 0.9692 | 0.3497 |
| Campylobacter jejuni          | 10.3233 | 10.2892 | 0.0341 | 1.0155 | 0.0033 | 0.9934 | 0.1809 |
| Helicobacter pylori           | 10.3348 | 10.3022 | 0.0326 | 1.0147 | 0.0032 | 0.9937 | 0.1771 |
| Prochlorococcus marinus       | 10.3699 | 10.3654 | 0.0045 | 1.0017 | 0.0004 | 0.9991 | 0.0671 |
| Streptococcus pyogenes        | 10.4105 | 10.3731 | 0.0374 | 1.0157 | 0.0036 | 0.9928 | 0.1893 |
| Neisseria meningitidis        | 10.5579 | 10.3391 | 0.2187 | 1.0752 | 0.0207 | 0.9586 | 0.4119 |
| Encephalitozoon cuniculi      | 10.6260 | 10.5106 | 0.1155 | 1.0518 | 0.0109 | 0.9783 | 0.3181 |
| Enterococcus faecium          | 10.7708 | 10.6355 | 0.1353 | 1.0504 | 0.0126 | 0.9749 | 0.3408 |
| Legionella pneumophila        | 10.8481 | 10.8310 | 0.0171 | 1.0075 | 0.0016 | 0.9969 | 0.1295 |
| Vibrio cholerae               | 10.9718 | 10.9058 | 0.0660 | 1.0238 | 0.0060 | 0.9880 | 0.2477 |
| Salmonella enterica           | 11.1197 | 11.0954 | 0.0243 | 1.0099 | 0.0022 | 0.9956 | 0.1540 |
| Escherichia coli              | 11.1318 | 11.0936 | 0.0382 | 1.0153 | 0.0034 | 0.9931 | 0.1914 |
| Pseudomonas aeruginosa        | 11.2894 | 11.2719 | 0.0175 | 1.0079 | 0.0015 | 0.9969 | 0.1310 |
| Cryptosporidium parvum        | 11.5589 | 11.5403 | 0.0186 | 1.0079 | 0.0016 | 0.9968 | 0.1350 |
| Saccharomyces cerevisiae      | 11.7676 | 11.6235 | 0.1442 | 1.0455 | 0.0123 | 0.9755 | 0.3525 |
| Cyanidioschyzon merolae       | 11.9156 | 11.8012 | 0.1144 | 1.0488 | 0.0096 | 0.9808 | 0.3191 |
| Cryptococcus neoformans       | 12.0917 | 11.9943 | 0.0974 | 1.0323 | 0.0081 | 0.9839 | 0.2972 |
| Plasmodium falciparum         | 12.2360 | 11.6337 | 0.6023 | 1.1290 | 0.0492 | 0.9016 | 0.5687 |
| Leishmania donovani           | 12.4757 | 12.3473 | 0.1285 | 1.0707 | 0.0103 | 0.9794 | 0.3367 |
| Dictyostelium discoideum      | 12.5086 | 11.8609 | 0.6477 | 1.1280 | 0.0518 | 0.8964 | 0.5798 |
| Neurospora crassa             | 12.6362 | 12.6070 | 0.0292 | 1.0104 | 0.0023 | 0.9954 | 0.1685 |
| Toxoplasma gondii             | 12.9402 | 12.8819 | 0.0583 | 1.0170 | 0.0045 | 0.9910 | 0.2350 |
| Ciona intestinalis            | 13.1112 | 12.9199 | 0.1913 | 1.0735 | 0.0146 | 0.9708 | 0.4002 |
| Caenorhabditis elegans        | 13.2898 | 13.0865 | 0.2033 | 1.0598 | 0.0153 | 0.9694 | 0.4108 |
| Tetrahymena thermophila       | 13.3091 | 13.1641 | 0.1451 | 1.0443 | 0.0109 | 0.9782 | 0.3565 |
| Arabidopsis thaliana          | 13.4172 | 13.2330 | 0.1842 | 1.0635 | 0.0137 | 0.9725 | 0.3948 |
| Drosophila melanogaster       | 13.6651 | 12.4174 | 1.2477 | 1.3403 | 0.0913 | 0.8174 | 0.6100 |
| Anopheles gambiae             | 13.8900 | 13.6037 | 0.2863 | 1.0990 | 0.0206 | 0.9588 | 0.4716 |
| Oryza brachyantha             | 13.9513 | 13.6657 | 0.2857 | 1.1309 | 0.0205 | 0.9590 | 0.4715 |
| Takifugu rubripes             | 14.0345 | 13.8478 | 0.1867 | 1.0757 | 0.0133 | 0.9734 | 0.3985 |
| Oryza glaberrima              | 14.0433 | 13.6672 | 0.3761 | 1.1523 | 0.0268 | 0.9464 | 0.5199 |
| Oryza sativa                  | 14.2560 | 13.3940 | 0.8619 | 1.2650 | 0.0605 | 0.8791 | 0.6307 |
| Branchiostoma floridae        | 14.4796 | 13.7859 | 0.6937 | 1.2802 | 0.0479 | 0.9042 | 0.6157 |
| Crassostrea gigas             | 14.5275 | 13.8372 | 0.6903 | 1.3060 | 0.0475 | 0.9050 | 0.6158 |
| Oreochromis niloticus         | 14.6461 | 14.3569 | 0.2891 | 1.1319 | 0.0197 | 0.9605 | 0.4765 |
| Strongylocentrotus purpuratus | 14.9421 | 13.9797 | 0.9624 | 1.3713 | 0.0644 | 0.8712 | 0.6486 |
| Gallus gallus                 | 14.9515 | 14.8165 | 0.1349 | 1.0401 | 0.0090 | 0.9820 | 0.3478 |
| Taeniopygia guttata           | 14.9640 | 14.8239 | 0.1401 | 1.0515 | 0.0094 | 0.9813 | 0.3537 |
| Ficedula albicollis           | 14.9798 | 13.9946 | 0.9852 | 1.1524 | 0.0658 | 0.8685 | 0.6502 |
| Anolis carolinensis           | 15.0053 | 13.9903 | 1.0150 | 1.2547 | 0.0676 | 0.8647 | 0.6514 |
| Aquila chrysaetos canadensis  | 15.0758 | 14.9877 | 0.0881 | 1.0270 | 0.0058 | 0.9883 | 0.2866 |
| Danio rerio                   | 15.1600 | 14.0845 | 1.0755 | 1.2414 | 0.0709 | 0.8581 | 0.6553 |
| Xenopus tropicalis            | 15.2468 | 13.9207 | 1.3261 | 1.3937 | 0.0870 | 0.8260 | 0.6491 |
| Pteropus vampyrus             | 15.4473 | 15.0499 | 0.3973 | 1.1548 | 0.0257 | 0.9486 | 0.5380 |
| Myotis lucifugus              | 15.4610 | 14.7547 | 0.7064 | 1.1734 | 0.0457 | 0.9086 | 0.6305 |
| Zea mays                      | 15.4701 | 11.8023 | 3.6678 | 2.3367 | 0.2371 | 0.5258 | 0.2784 |
| Alligator mississippiensis    | 15.5089 | 15.2492 | 0.2597 | 1.0896 | 0.0167 | 0.9665 | 0.4601 |
| Cricetulus griseus            | 15.5681 | 15.1565 | 0.4116 | 1.1037 | 0.0264 | 0.9471 | 0.5451 |
| Otolemur garnettii            | 15.6153 | 15.1820 | 0.4333 | 1.1397 | 0.0277 | 0.9445 | 0.5546 |
| Tursiops truncatus            | 15.6245 | 14.8615 | 0.7630 | 1.2088 | 0.0488 | 0.9023 | 0.6417 |
| Chrysemys picta               | 15.6351 | 14.8867 | 0.7484 | 1.3332 | 0.0479 | 0.9043 | 0.6397 |
| Sus scrofa                    | 15.6370 | 14.8606 | 0.7764 | 1.2709 | 0.0497 | 0.9007 | 0.6438 |
| Papio anubis                  | 15.6716 | 15.0369 | 0.6347 | 1.1202 | 0.0405 | 0.9190 | 0.6183 |
| Mus musculus                  | 15.6719 | 14.4999 | 1.1720 | 1.2244 | 0.0748 | 0.8504 | 0.6659 |
| Callithrix jacchus            | 15.6837 | 15.0393 | 0.6444 | 1.1633 | 0.0411 | 0.9178 | 0.6207 |
| Rattus norvegicus             | 15.6867 | 14.8396 | 0.8471 | 1.2106 | 0.0540 | 0.8920 | 0.6532 |
| Nomascus leucogenys           | 15.6902 | 14.9371 | 0.7531 | 1.1923 | 0.0480 | 0.9040 | 0.6411 |
| Latimeria chalumnae           | 15.7068 | 14.8094 | 0.8974 | 1.4661 | 0.0571 | 0.8857 | 0.6583 |
| Macaca mulatta                | 15.7134 | 15.1346 | 0.5788 | 1.2144 | 0.0368 | 0.9263 | 0.6047 |
| Microcebus murinus            | 15.7173 | 14.5382 | 1.1790 | 1.7376 | 0.0750 | 0.8500 | 0.6668 |
| Pongo abelii                  | 15.7482 | 14.9524 | 0.7958 | 1.2542 | 0.0505 | 0.8989 | 0.6480 |
| Homo sapiens                  | 15.7621 | 14.8298 | 0.9322 | 1.2083 | 0.0591 | 0.8817 | 0.6618 |
| Pan troglodytes               | 15.7756 | 14.9464 | 0.8292 | 1.2775 | 0.0526 | 0.8949 | 0.6526 |
| Tarsius syrichta              | 15.8428 | 14.9545 | 0.8883 | 1.2094 | 0.0561 | 0.8879 | 0.6597 |
| Monodelphis domestica         | 15.8528 | 14.9615 | 0.8913 | 1.1738 | 0.0562 | 0.8876 | 0.6601 |
| Pinus taeda                   | 17.2161 | 15.0218 | 2.1943 | 1.8132 | 0.1275 | 0.7451 | 0.6127 |

**Table 3.** The table of seventy genomes ordered by logarithmic length, *LG*, with the values of the main informational indexes.

| Species                       | Entropy            |                    |         | Antientropic component |                    |         |
|-------------------------------|--------------------|--------------------|---------|------------------------|--------------------|---------|
|                               | $k = I_{g_2}( G )$ | $k = I_{g_4}( G )$ | $k = 6$ | $k = I_{g_2}( G )$     | $k = I_{g_4}( G )$ | $k = 6$ |
| Carsonella ruddii             | 17.2492            | 13.4697            | 9.6804  | 0.0355                 | 3.8149             | 7.6042  |
| Chlamydomonas reinhardtii     | 17.4350            | 15.7458            | 11.3652 | 0.3094                 | 1.9986             | 6.3793  |
| Nanoarchaeum equitans         | 18.8954            | 16.7812            | 11.1303 | 0.0097                 | 2.1238             | 7.7747  |
| Mycoplasma genitalium         | 19.1031            | 17.0126            | 11.1289 | 0.0428                 | 2.1333             | 8.0170  |
| Trichomonas vaginalis         | 19.0103            | 17.2127            | 11.2786 | 0.1476                 | 1.9452             | 7.8793  |
| Campylobacter jejuni          | 20.6125            | 18.2061            | 11.0350 | 0.0341                 | 2.4405             | 9.6116  |
| Helicobacter pylori           | 20.6370            | 18.6428            | 11.3566 | 0.0326                 | 2.0268             | 9.3129  |
| Prochlorococcus marinus       | 20.7353            | 19.1064            | 11.5169 | 0.0045                 | 1.6334             | 9.2229  |
| Streptococcus pyogenes        | 20.7836            | 19.3124            | 11.6361 | 0.0374                 | 1.5086             | 9.1848  |
| Neisseria meningitidis        | 20.8970            | 19.2370            | 11.6142 | 0.2187                 | 1.8788             | 9.5015  |
| Encephalitozoon cuniculi      | 21.1366            | 19.8268            | 11.7543 | 0.1155                 | 1.4252             | 9.4978  |
| Enterococcus faecium          | 21.4063            | 19.8874            | 11.5896 | 0.1353                 | 1.6542             | 9.9520  |
| Legionella pneumophila        | 21.6791            | 20.2001            | 11.6195 | 0.0171                 | 1.4960             | 10.0766 |
| Vibrio cholerae               | 21.8776            | 20.0712            | 11.8176 | 0.0660                 | 2.5076             | 10.1260 |
| Salmonella enterica           | 22.2151            | 20.6806            | 11.7528 | 0.0243                 | 1.2630             | 10.4866 |
| Escherichia coli              | 22.2254            | 20.8378            | 11.7829 | 0.0382                 | 1.4016             | 10.4807 |
| Pseudomonas aeruginosa        | 22.5613            | 20.9072            | 11.2003 | 0.0175                 | 1.3564             | 11.3784 |
| Cryptosporidium parvum        | 23.0992            | 20.8029            | 11.1674 | 0.0186                 | 2.3149             | 11.9504 |
| Saccharomyces cerevisiae      | 23.3911            | 19.4624            | 11.6736 | 0.1442                 | 5.0096             | 11.8617 |
| Cyanidioschyzon merolae       | 23.7168            | 21.9660            | 11.8021 | 0.1144                 | 1.5693             | 12.0292 |
| Cryptococcus neoformans       | 24.0861            | 20.1987            | 11.8996 | 0.0974                 | 4.8186             | 12.2838 |
| Plasmodium falciparum         | 23.8697            | 22.4388            | 9.9978  | 0.6023                 | 1.3924             | 14.4742 |
| Leishmania donovani           | 24.8230            | 22.9899            | 11.6093 | 0.1285                 | 1.1935             | 13.3422 |
| Dictyostelium discoideum      | 24.3695            | 23.0664            | 10.2441 | 0.6477                 | 1.8851             | 14.7731 |
| Neurospora crassa             | 25.2432            | 23.8994            | 11.9033 | 0.0292                 | 1.3730             | 13.3691 |
| Toxoplasma gondii             | 25.8221            | 22.6411            | 11.7489 | 0.0583                 | 3.9772             | 14.1315 |
| Ciona intestinalis            | 26.0311            | 24.3322            | 11.5368 | 0.1913                 | 1.5482             | 14.6856 |
| Caenorhabditis elegans        | 26.3762            | 24.0225            | 11.4139 | 0.2033                 | 2.1999             | 15.1656 |
| Tetrahymena thermophila       | 26.4732            | 24.1318            | 10.4827 | 0.1451                 | 2.4477             | 16.1356 |
| Arabidopsis thaliana          | 26.6503            | 24.7988            | 11.5543 | 0.1842                 | 2.0357             | 15.2801 |
| Drosophila melanogaster       | 26.0825            | 24.6902            | 11.7565 | 1.2477                 | 2.6400             | 15.5737 |
| Anopheles gambiae             | 27.4937            | 25.9133            | 11.8110 | 0.2863                 | 1.9894             | 15.9691 |
| Oryza brachyantha             | 27.6170            | 26.0192            | 11.7356 | 0.2857                 | 1.7609             | 16.1670 |
| Takifugu rubripes             | 27.8824            | 26.0377            | 11.7420 | 0.1867                 | 2.0488             | 16.3270 |
| Oryza glaberrima              | 27.7104            | 26.3551            | 11.7984 | 0.3761                 | 1.7139             | 16.2881 |
| Oryza sativa                  | 27.6500            | 25.9591            | 11.8117 | 0.8619                 | 2.5529             | 16.7002 |
| Branchiostoma floridae        | 28.2655            | 26.0147            | 11.7719 | 0.6937                 | 2.7076             | 17.1873 |
| Crassostrea gigas             | 28.3647            | 26.1425            | 11.4230 | 0.6903                 | 2.9125             | 17.6319 |
| Oreochromis niloticus         | 29.0030            | 27.1295            | 11.6116 | 0.2891                 | 2.1626             | 17.6805 |
| Strongylocentrotus purpuratus | 28.9218            | 26.8875            | 11.6060 | 0.9624                 | 2.9966             | 18.2782 |
| Gallus gallus                 | 29.7680            | 26.7651            | 11.5773 | 0.1349                 | 3.2455             | 18.3256 |
| Taeniopygia guttata           | 29.7879            | 27.0544            | 11.5050 | 0.1401                 | 2.9052             | 18.4230 |
| Ficedula albicollis           | 28.9744            | 27.7685            | 11.3629 | 0.9852                 | 2.1595             | 18.5967 |
| Anolis carolinensis           | 28.9956            | 26.5610            | 11.5850 | 1.0150                 | 3.7590             | 18.4256 |
| Aquila chrysaetos canadensis  | 30.0635            | 27.8182            | 11.6049 | 0.0881                 | 2.0847             | 18.5467 |
| Danio rerio                   | 29.2445            | 25.1100            | 11.5093 | 1.0755                 | 5.8302             | 18.8107 |
| Xenopus tropicalis            | 29.1674            | 27.0775            | 11.6203 | 1.3261                 | 3.4161             | 18.8733 |
| Pteropus vampyrus             | 30.4972            | 28.1798            | 11.5986 | 0.3973                 | 1.9718             | 19.2959 |
| Myotis lucifugus              | 30.2157            | 27.9072            | 11.6182 | 0.7064                 | 3.0149             | 19.3038 |
| Zea mays                      | 27.2725            | 28.4813            | 11.8822 | 3.6678                 | 2.4133             | 19.0581 |
| Alligator mississippiensis    | 30.7582            | 27.7725            | 11.6238 | 0.2597                 | 3.6412             | 19.3941 |
| Cricetulus griseus            | 30.7246            | 28.5329            | 11.5406 | 0.4116                 | 2.4849             | 19.5956 |
| Otolemur garnetti             | 30.7973            | 28.3040            | 11.5669 | 0.4333                 | 2.8322             | 19.6637 |
| Tursiops truncatus            | 30.4860            | 28.3923            | 11.6206 | 0.7630                 | 3.0423             | 19.6284 |
| Chrysemys picta               | 30.5218            | 27.9411            | 11.6751 | 0.7484                 | 3.3329             | 19.5951 |
| Sus scrofa                    | 30.4976            | 28.5049            | 11.5885 | 0.7764                 | 2.7653             | 19.6856 |
| Papio anubis                  | 30.7086            | 28.3383            | 11.5622 | 0.6347                 | 2.8923             | 19.7811 |
| Mus musculus                  | 30.1719            | 28.2116            | 11.5680 | 1.1720                 | 3.0373             | 19.7759 |
| Callithrix jacchus            | 30.7230            | 27.8796            | 11.5562 | 0.6444                 | 3.4643             | 19.8111 |
| Rattus norvegicus             | 30.5264            | 28.0116            | 11.5934 | 0.8471                 | 3.3688             | 19.7801 |
| Nomascus leucogenys           | 30.6272            | 28.0905            | 11.5569 | 0.7531                 | 3.2768             | 19.8234 |
| Latimeria chalumnae           | 30.5162            | 28.0310            | 11.5712 | 0.8974                 | 3.3123             | 19.8424 |
| Macaca mulatta                | 30.8480            | 28.3075            | 11.5616 | 0.5788                 | 3.0352             | 19.8652 |
| Microcebus murinus            | 30.2555            | 28.3216            | 11.6011 | 1.1790                 | 3.1051             | 19.8334 |
| Pongo abelii                  | 30.7006            | 28.1258            | 11.5518 | 0.7958                 | 3.3706             | 19.9447 |
| Homo sapiens                  | 30.5919            | 28.2741            | 11.5572 | 0.9322                 | 3.0994             | 19.9669 |
| Pan troglodytes               | 30.7220            | 28.1484            | 11.5533 | 0.8292                 | 3.4028             | 19.9978 |
| Tarsius syrichta              | 30.7973            | 27.9580            | 11.5743 | 0.8883                 | 3.5661             | 20.1113 |
| Monodelphis domestica         | 30.8144            | 28.0452            | 11.4268 | 0.8913                 | 3.6605             | 20.2789 |
| Pinus taeda                   | 32.2379            | 28.0957            | 11.5953 | 2.1943                 | 3.5899             | 22.8368 |

**Table 4.** Entropy and antientropic component of the 70 analyzed genomes by taking into account  $k = I_{g_2}(|G|)$ ,  $k = I_{g_4}(|G|)$ , and  $k = 6$ .



| Species                       | Taxonomy   | Common name                                | Source   | ID                 | G              | N%    |
|-------------------------------|------------|--------------------------------------------|----------|--------------------|----------------|-------|
| Alligator mississippiensis    | vertebrata | american alligator                         | UCSC     | allMis1            | 2,174,243,242  | 2.09  |
| Anolis carolinensis           | vertebrata | carolina anole (lizard)                    | UCSC     | anoCar2            | 1,081,661,814  | 5.14  |
| Anopheles gambiae             | animalia   |                                            | NCBI     | PEST               | 230,482,020    | 2.36  |
| Aquila chrysaetos canadensis  | vertebrata | golden eagle                               | NCBI     | aquChr1            | 1,192,743,076  | 1.07  |
| Arabidopsis thaliana          | plantae    |                                            | Ensembl  | TAIR10             | 119,667,750    | 0.16  |
| Branchiostoma floridae        | animalia   | lancet                                     | NCBI     | barFlo1            | 521,895,125    | 7.95  |
| Caenorhabditis elegans        | animalia   |                                            | UCSC     | ce10               | 100,286,070    | 0.00  |
| Callithrix jacchus            | primates   | marmoset                                   | UCSC     | calJac3            | 2,770,219,215  | 5.38  |
| Campylobacter jejuni          | prokaryota |                                            | NCBI     | NC_002163.1        | 1,641,481      | 0.00  |
| Carsonella ruddii             | prokaryota |                                            | NCBI     | PV                 | 159,662        | 0.00  |
| Chlamydomonas reinhardtii     | plantae    | green alga                                 | NCBI     | v3.1.28            | 219,586        | 0.00  |
| Chrysemys picta               | vertebrata | painted turtle                             | UCSC     | chrPic1            | 2,589,745,704  | 16.66 |
| Ciona intestinalis            | vertebrata |                                            | NCBI     | KH                 | 78,296,155     | 2.49  |
| Crassostrea gigas             | animalia   | pacific oyster                             | Ensembl  | GCA_000297895.1.25 | 557,717,710    | 11.81 |
| Cricetulus griseus            | vertebrata | chinese hamster                            | UCSC     | criGri1            | 2,360,130,144  | 2.49  |
| Cryptococcus neoformans       | fungi      |                                            | NCBI     | JEC21              | 19,051,922     | 0.01  |
| Cryptosporidium parvum        | eukaryota  |                                            | NCBI     | II                 | 9,102,324      | 0.20  |
| Cyanidioschyzon merolae       | eukaryota  | red alga (single-cell)                     | Ensembl  | ASM9120v1          | 14,925,130     | 0.00  |
| Danio rerio                   | vertebrata | zebrafish                                  | NCBI     | GRZ10              | 1,340,430,591  | 0.14  |
| Dictyostelium discoideum      | eukaryota  |                                            | NCBI     | GCA_000004695.1    | 33,958,027     | 0.07  |
| Drosophila melanogaster       | animalia   | fruit fly                                  | UCSC     | dm3                | 168,736,537    | 3.77  |
| Encephalitozoon cuniculi      | fungi      |                                            | NCBI     | GB-M1              | 2,497,519      | 0.03  |
| Enterococcus faecium          | prokaryota |                                            | NCBI     | DO                 | 3,052,572      | 0.00  |
| Escherichia coli              | prokaryota |                                            | NCBI     | 536                | 5,034,947      | 0.00  |
| Ficedula albicollis           | vertebrata | collared flycatcher                        | NCBI     | AGTO02             | 1,044,082,078  | 0.88  |
| Gallus gallus                 | vertebrata | red junglefowl (chicken)                   | UCSC     | galGal4            | 1,003,853,215  | 1.08  |
| Helicobacter pylori           | prokaryota |                                            | NCBI     | NC_000915.1        | 1,667,867      | 0.00  |
| Homo sapiens                  | primates   | human                                      | UCSC     | GRCh38             | 3,088,286,401  | 4.88  |
| Latimeria chalumnae           | vertebrata | west indian ocean coelacanth               | UCSC     | latCha1            | 2,860,591,921  | 23.67 |
| Legionella pneumophila        | prokaryota |                                            | NCBI     | Philadelphia1      | 3,397,754      | 0.00  |
| Leishmania donovani           | eukaryota  |                                            | NCBI     | ASM22713v2         | 32,444,968     | 3.68  |
| Macaca mulatta                | primates   | rhesus macaque                             | UCSC     | rheMac3            | 2,886,669,826  | 11.21 |
| Microcebus murinus            | primates   | grey mouse lemur                           | UCSC     | micMur1            | 2,902,270,736  | 36.17 |
| Monodelphis domestica         | vertebrata | gray short-tailed opossum                  | UCSC     | monDom5            | 3,502,390,117  | 2.56  |
| Mus musculus                  | vertebrata | mouse                                      | UCSC     | mm10               | 2,725,537,669  | 2.86  |
| Mycoplasma genitalium         | prokaryota |                                            | NCBI     | G37                | 580,076        | 0.00  |
| Myotis lucifugus              | vertebrata | little brown bat                           | UCSC     | myoLuc2            | 2,034,575,300  | 3.35  |
| Nanoarchaeum equitans         | prokaryota |                                            | NCBI     | Kin4-M             | 490,885        | 0.00  |
| Neisseria meningitidis        | prokaryota |                                            | NCBI     | MC58               | 2,272,360      | 0.00  |
| Neurospora crassa             | fungi      |                                            | NCBI     | OR74A              | 40,527,912     | 0.09  |
| Nomascus leucogenys           | primates   | northern white-cheeked gibbon              | UCSC     | nomLeu3            | 2,795,260,045  | 6.57  |
| Oreochromis niloticus         | vertebrata | nile tilapia                               | UCSC     | oreNil2            | 657,367,599    | 7.74  |
| Oryza brachyantha             | plantae    | african wild rice                          | Ensembl  | oryza1.4b          | 250,927,218    | 6.43  |
| Oryza glaberrima              | plantae    | african rice (domesticated)                | Ensembl  | AG11.1             | 285,037,524    | 4.00  |
| Oryza sativa                  | plantae    | asian rice (common rice)                   | NCBI     | v4.0               | 382,778,125    | 2.63  |
| Otomomys garnetti             | primates   | northern greater galago (bush baby)        | UCSC     | otoGar3            | 2,519,724,550  | 6.36  |
| Pan troglodytes               | primates   | chimpanzee                                 | UCSC     | panTro4            | 3,146,680,125  | 12.41 |
| Papio anubis                  | primates   | olive baboon                               | UCSC     | papAnu2            | 2,724,327,674  | 1.54  |
| Pinus taeda                   | plantae    | loblolly pine                              | Dendrome | v1.01              | 23,180,477,227 | 13.08 |
| Plasmodium falciparum         | eukaryota  |                                            | NCBI     | 3D7                | 23,270,305     | 0.00  |
| Pongo abelii                  | primates   | sumatran orangutan                         | UCSC     | ponAbe2            | 3,029,507,528  | 10.12 |
| Prochlorococcus marinus       | prokaryota |                                            | NCBI     | NC_005042.1        | 1,751,080      | 0.00  |
| Pseudomonas aeruginosa        | prokaryota |                                            | NCBI     | PAO1               | 6,264,404      | 0.00  |
| Pteropus vampyrus             | vertebrata | large flying fox (big bat)                 | UCSC     | pteVam1            | 1,996,076,410  | 7.85  |
| Rattus norvegicus             | vertebrata | brown rat                                  | UCSC     | rn6                | 2,782,028,915  | 4.68  |
| Saccharomyces cerevisiae      | fungi      | brewer's yeast                             | UCSC     | sacCer3            | 12,157,105     | 0.00  |
| Salmonella enterica           | prokaryota |                                            | NCBI     | LT2                | 4,951,371      | 0.00  |
| Streptococcus pyogenes        | prokaryota |                                            | NCBI     | M1GAS              | 1,852,433      | 0.00  |
| Strongylocentrotus purpuratus | animalia   | strongylocentrotus purpuratus (sea urchin) | NCBI     | Spur4.2            | 990,915,289    | 8.93  |
| Sus scrofa                    | vertebrata | wild boar (pig)                            | UCSC     | susScr3            | 2,596,656,069  | 10.52 |
| Taeniopygia guttata           | vertebrata | zebra finch                                | UCSC     | taeGut2            | 1,021,479,793  | 0.64  |
| Takifugu rubripes             | vertebrata |                                            | UCSC     | fr3                | 281,588,809    | 4.52  |
| Tarsius syrichta              | primates   | philippine tarsier                         | UCSC     | tarSyr2            | 3,453,864,774  | 1.39  |
| Tetrahymena thermophila       | eukaryota  |                                            | NCBI     | SB210              | 103,014,375    | 0.06  |
| Toxoplasma gondii             | eukaryota  |                                            | Ensembl  | ME49               | 61,769,095     | 0.06  |
| Trichomonas vaginalis         | eukaryota  |                                            | TrichDB  | G3                 | 584,929        | 0.36  |
| Tursiops truncatus            | vertebrata | common bottlenose dolphin                  | UCSC     | turTru2            | 2,551,980,185  | 8.60  |
| Vibrio cholerae               | prokaryota |                                            | NCBI     | N16961             | 4,033,464      | 0.00  |
| Xenopus tropicalis            | vertebrata | western clawed frog                        | UCSC     | xenTro3            | 1,511,735,326  | 10.15 |
| Zea mays                      | plantae    | maize                                      | NCBI     | B73v3              | 2,060,411,742  | 0.63  |

**Table 5.** The complete list of 70 genomes with the common names (when available), their biological taxonomy, their common name, the source database from where each has been downloaded, the corresponding genome assembly ID within the database, the genome length |G|, (genomes may include standard chromosomes, as well as mitochondrial ones, plasmids and linkage groups), and the percentage N% of unknown nucleotides.

| Gene ID    | Description                                                                      |
|------------|----------------------------------------------------------------------------------|
| MG_rrnA16S | 16S ribosomal rRNA                                                               |
| MG_289     | phosphonate ABC transporter, substrate binding protein (P37), putative           |
| MG_340     | DNA-directed RNA polymerase, beta subunit                                        |
| MG_497     | tRNA (ARG)                                                                       |
| MG_186     | Oligosaccharide or polyol ABC transporter, substrate binding protein             |
| MG_194     | phenylalanyl-tRNA synthetase, alpha subunit                                      |
| MG_312     | high molecular weight cytodherence accessory protein 1                           |
| MG_069     | PTS system, glucose-specific IIABC component                                     |
| MG_386     | P200 protein                                                                     |
| MG_191     | MgPa adhesin                                                                     |
| MG_217     | P65 adhesin                                                                      |
| MG_192     | P110 protein                                                                     |
| MG_318     | P32 adhesin                                                                      |
| MG_159     | ribosomal protein L29                                                            |
| MG_317     | high molecular weight cytodherence accessory protein 3                           |
| MG_338     | lipoprotein, putative                                                            |
| MG_200     | DnaJ domain protein                                                              |
| MG_203     | DNA topoisomerase IV, B subunit                                                  |
| MG_226     | amino acid-polyamine-organocation (APC) permease                                 |
| MG_506     | tRNA (SER)                                                                       |
| MG_042     | spermidine/putrescine (polyamine) ABC transporter, ATP-binding protein, putative |
| MG_185     | lipoprotein, putative                                                            |
| MG_309     | lipoprotein, putative                                                            |
| MG_509     | tRNA (LYS)                                                                       |
| MG_434     | uridylate kinase                                                                 |
| MG_079     | oligopeptide ABC transporter, ATP-binding protein                                |
| MG_068     | lipoprotein, putative                                                            |
| MG_470     | CobQ/CobB/MinD/ParA nucleotide binding domain                                    |
| MG_219     | unknown                                                                          |
| MG_290     | phosphonate ABC transporter, ATP-binding protein, putative                       |
| MG_526     | salivaricin A ABC transporter, ATP-binding protein                               |
| MG_384     | GTPase1 Obg                                                                      |
| MG_111     | glucose-6-phosphate isomerase                                                    |
| MG_100     | glutamyl-tRNA(Gln) and/or aspartyl-tRNA(Asn) amidotransferase, B subunit         |
| MG_500     | tRNA (LEU)                                                                       |
| MG_246     | Ser/Thr protein phosphatase 2A                                                   |
| MG_118     | UDP-glucose 4-epimerase                                                          |
| MG_047     | S-adenosylmethionine synthetase                                                  |
| MG_463     | dimethyladenosine transferase                                                    |
| MG_360     | ImpB/MucB/SamB family protein                                                    |
| MG_179     | metal ion (cobalt) ABC transporter, ATP-binding protein, putative                |
| MG_008     | tRNA modification GTPase TrmE                                                    |
| MG_184     | adenine-specific DNA modification methylase                                      |
| MG_387     | GTP-binding protein Era                                                          |

**Table 6.** A list of 44 genes of *Mycoplasma genitalium* genome that, when removed, provide the failure of genome informational laws. Table reports gene identifiers and their description provided in the *WholeCellKB* database (<http://www.wholecellkb.org/list/Mgenitalium/Gene> ). The selection of the reported genes was done iteratively by making use of a greedy removal procedure. At each step, the gene is removed, together with its genomic context, that minimizes the  $AF$  value. Then, the procedure is applied iteratively to the reduced genome. Genes are reported in the same order they were selected. After 44 gene deletions, we obtained a sequence of length 487,137, hosting 476 genes, for which the fourth law (see Equation 8 in the paper) does not hold. Further gene removals produce sequences where other laws fail (even if the removal do not minimize  $AF$ ).
